# Supplementary material
Source: PubMed Central journal article supplement (PMC3277787)
Supplement: NIHMS350932-supplement-1_si_001.pdf [file NIHMS350932-supplement-1_si_001.pdf]

# Supporting Information

## Regiospecific Plasmonic Assemblies for *in-situ* Raman Spectroscopy in Live Cells

Liguang Xu<sup>1,#</sup>, Hua Kuang<sup>1,#</sup>, Chuanlai Xu<sup>1,#</sup>, Wei Ma<sup>1,2</sup>, Libing Wang<sup>1,\*</sup>, Nicholas A. Kotov<sup>2,\*</sup>

<sup>1</sup>School of Food Science and Technology, State Key Lab of Food Science and Technology, Jiangnan University, Wuxi, JiangSu, 214122, PRC

<sup>2</sup>Department of Chemical Engineering, University of Michigan, Ann Arbor, Michigan, 48109

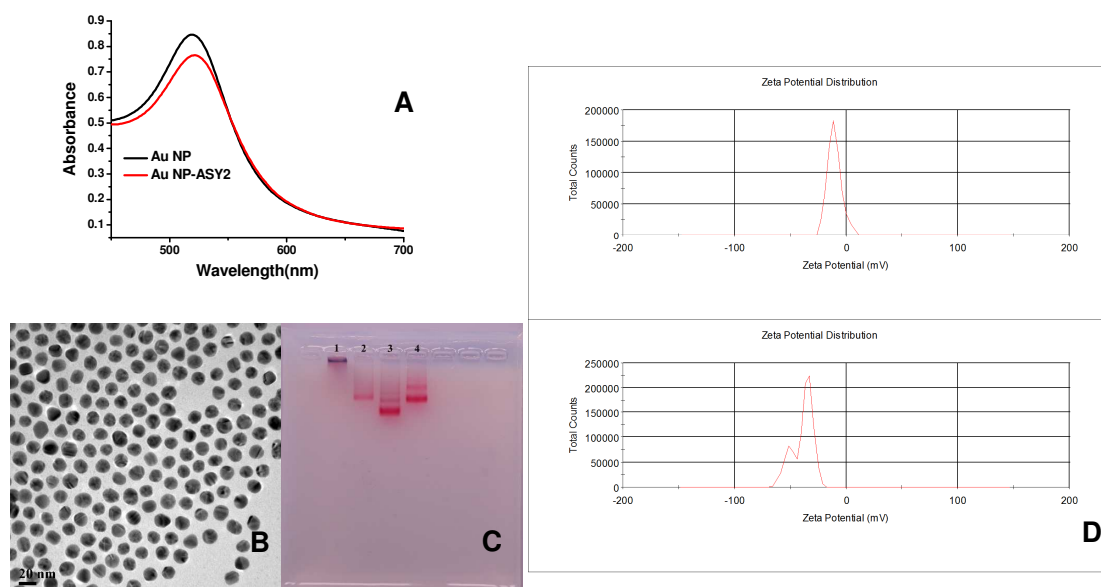

**Figure S1.** Comparative characterization of Au NPs (A) UV/Vis spectra of original and ASY2-modified Au NPs ; (B) Representative TEM image of ASY2-modified Au NPs; (C) Electrophoresis of Au NPs after different modification procedures: Lane 1: original Au NPs; Lane 2,4: Au NPs-DNA modification according to reference 1; Lane 3: Au NPs-DNA modification according to method described here; (D) Zeta potential data for original Au NPs (top) and ASY2-modified Au NPs (bottom).

# These authors contributed to this paper equally.

\* To whom correspondence should be addressed. E-mail: [wanglb@hnciq.gov.cn](mailto:wanglb@hnciq.gov.cn); [kotov@umich.edu](mailto:kotov@umich.edu)

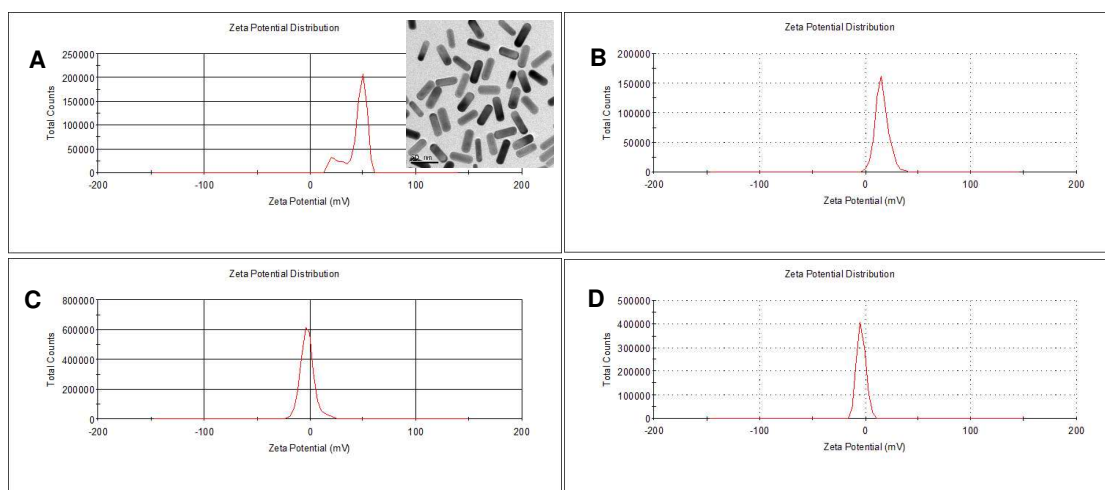

**Figure S2.** Comparative characterization of original and modified Au NRs. (A) Zeta potential of original Au NR, (B) Au NRs ASY1-modified the ends, (C) Au NRs ASY1-modified on the sides, (D) Au NRs ASY1-modified over the entire surface.

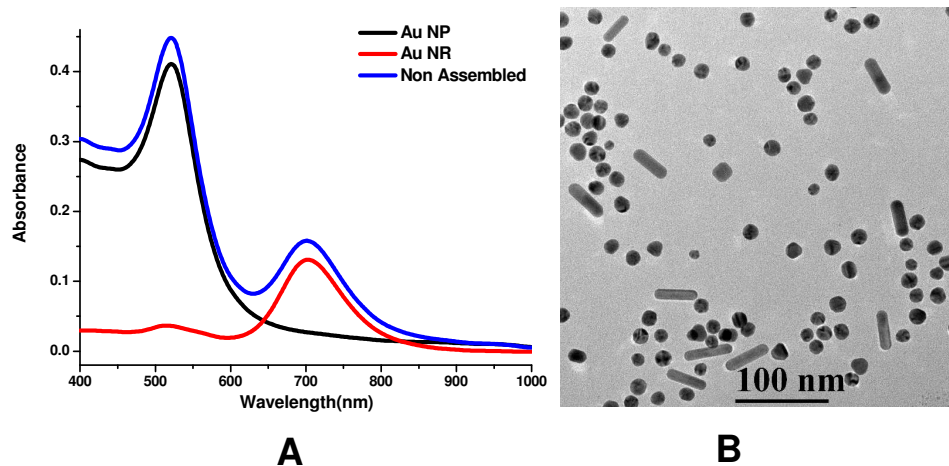

**Figure S3.** UV-/Vis spectrum (A) and TEM images (B) for the control experiment with non-assembling NP and NRs.

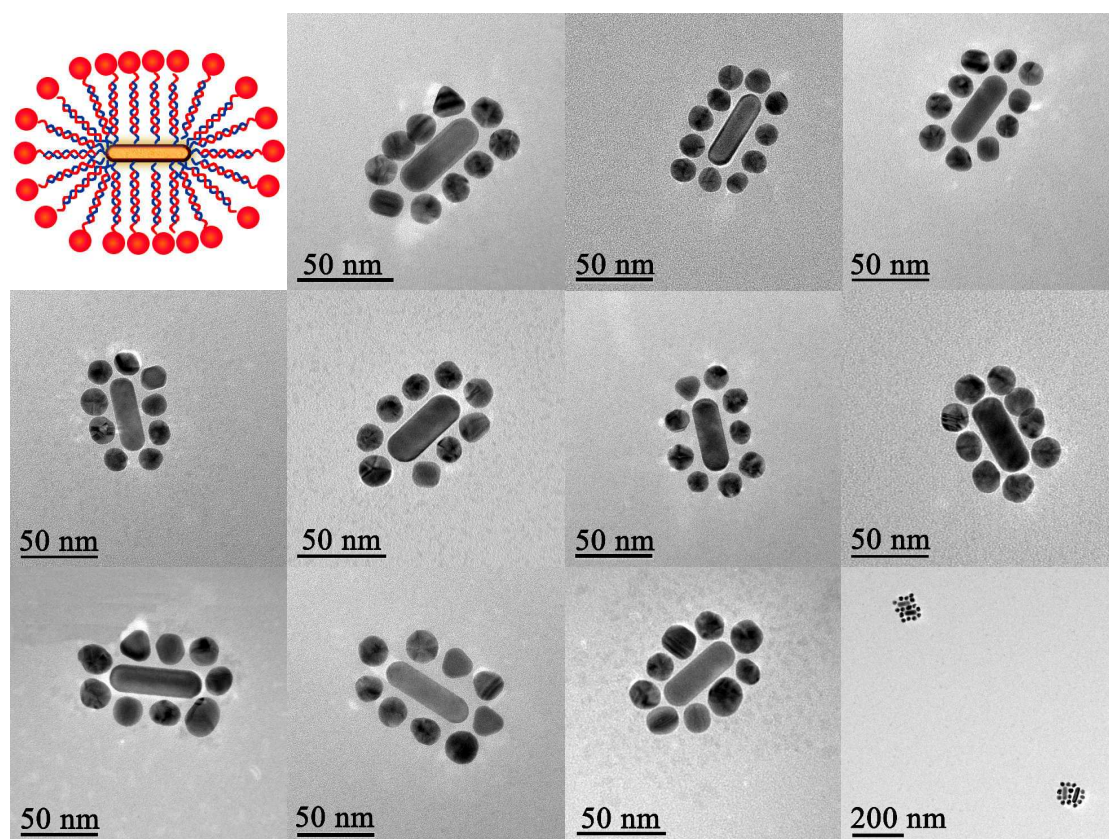

**Figure S4.** Representative TEM images of *Satellite* assemblies.

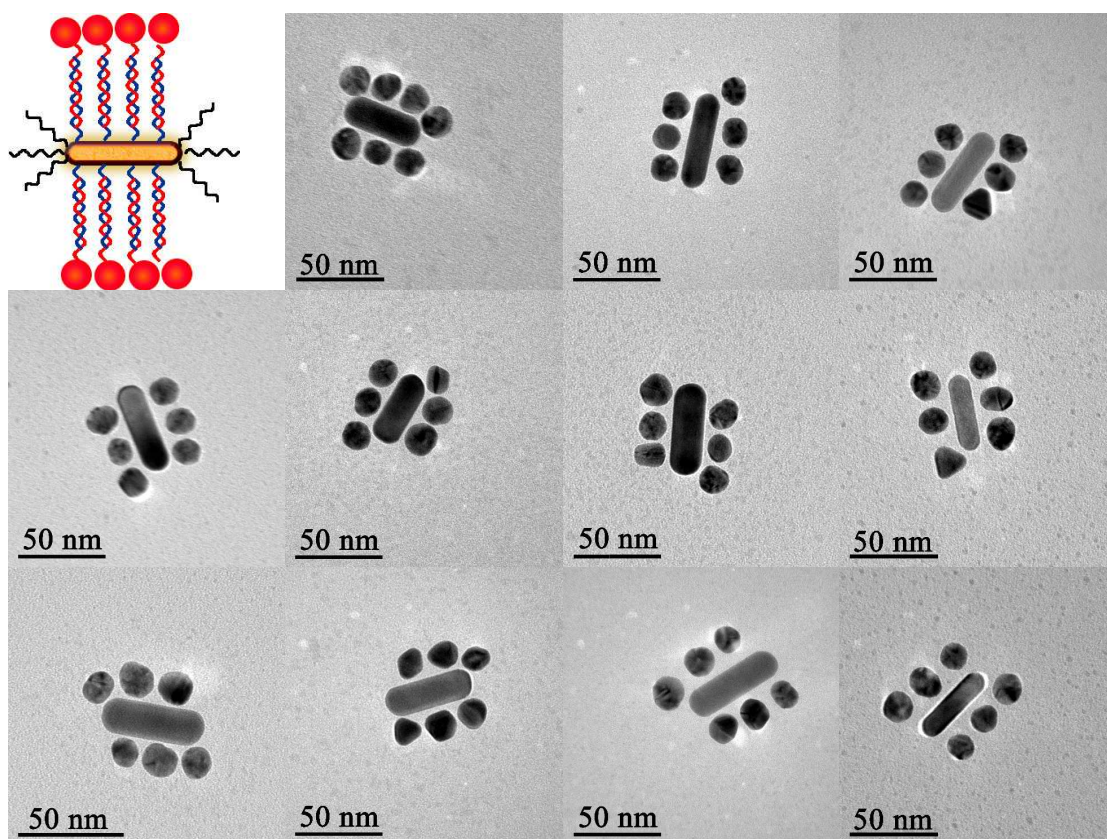

**Figure S5.** Representative TEM images of *Side* assemblies.



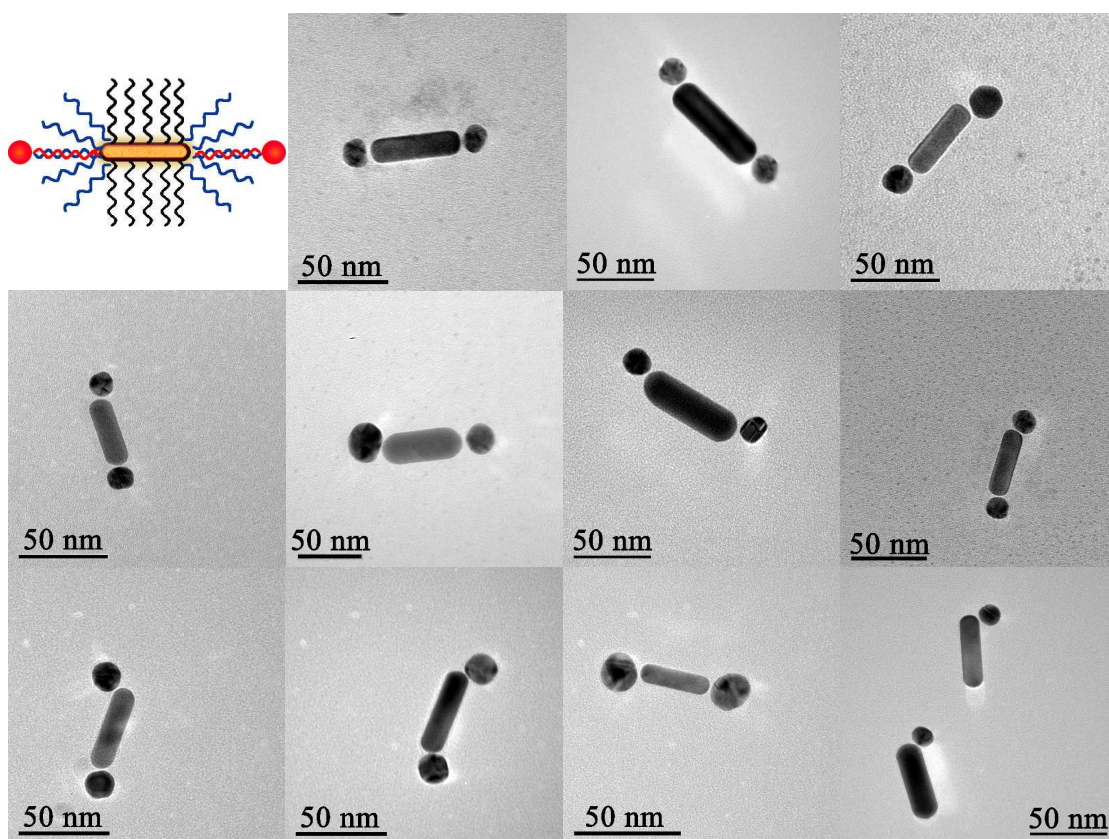

**Figure S6.** Representative TEM images of *End* assemblies.

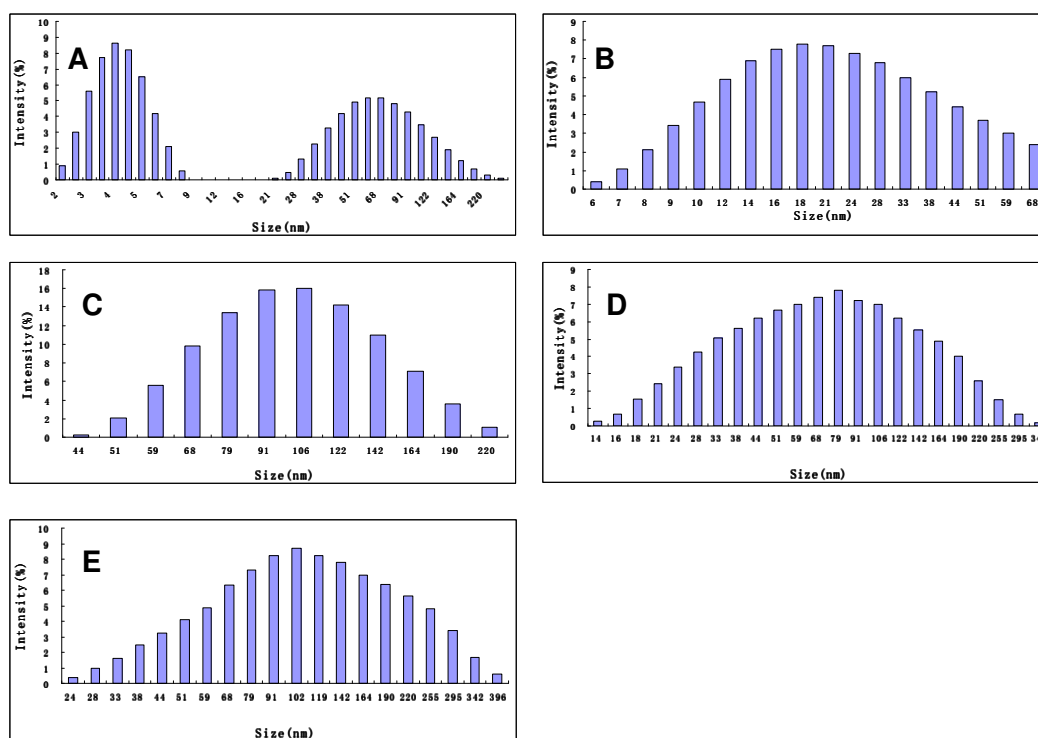

**Figure S7.** Hydrodynamic diameters of the specific assemblies and building blocks determined by DLS: (A) non-assembled Au NRs; (B) non-assembled Au NPs; (C) *Satellite* assemblies; (D) *Side* assemblies; (E) *End* assemblies.

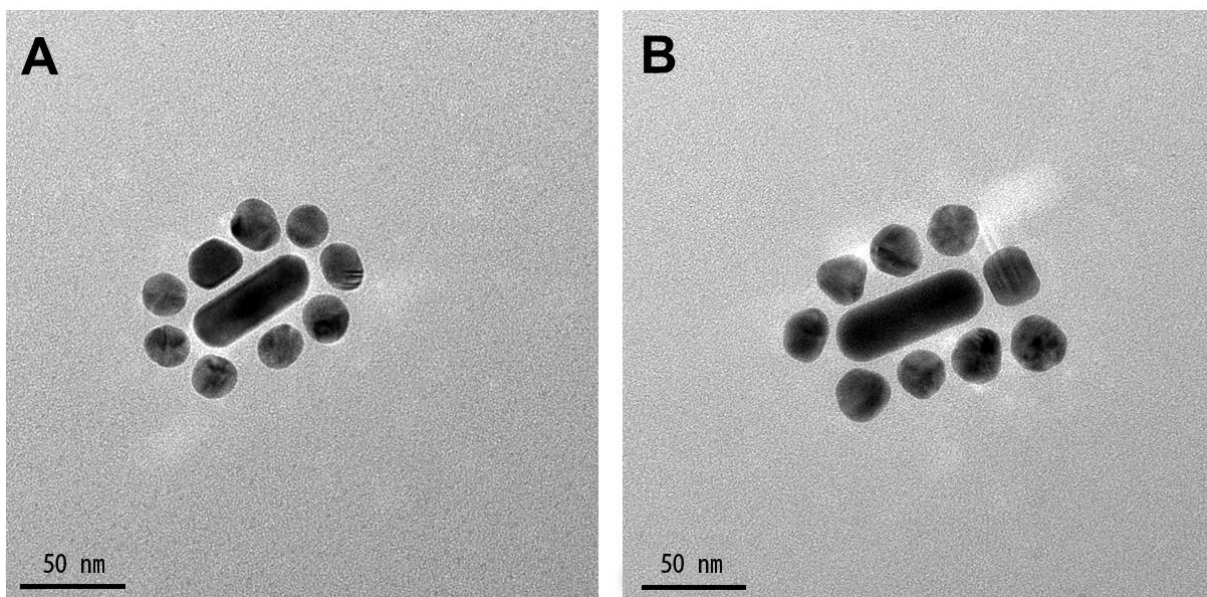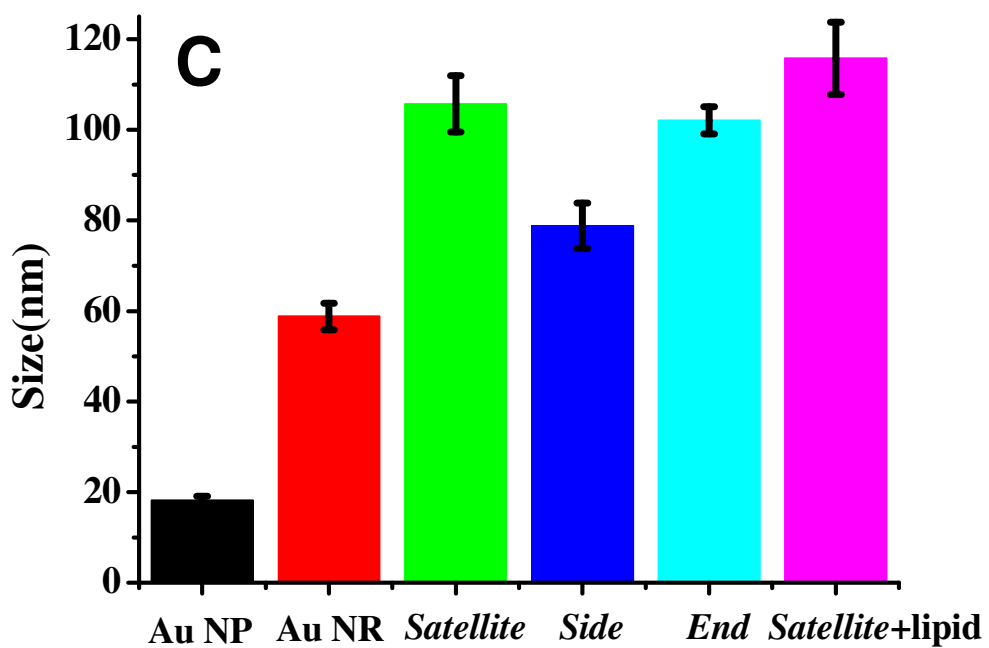

**Figure S8.** TEM images of the *Satellite* assemblies before (A) and after (B) mixed with the lipid; (C)

The size of the *Satellite* assemblies with and without the lipid in Fig. 6H.



## References

1. H. Kuang, S. Zhao, W. Chen, W. Ma, Q. Yong, L. Xu, L. Wang and C. Xu, *Biosensors and Bioelectronics*, 2011, **26**, 2495-2499.
